# Supplementary material
Source: Springer Nature journal article supplement (https://www.springermedizin.de/resource/supplementary/12889_2009_2344_MOESM1_ESM.pdf/9485486)
Supplement: MOESM1 [file 9485486]

ART<sup>a</sup>-naïve adults starting ART<sup>a</sup> 1.2.05 -  
1.6.06: N=1490

Never collected their  
ART<sup>a</sup>: N=140

Used in the analysis: N=1350

Left the programme alive  
before censoring point:  
N= 228

Alive at censoring  
point: N=937

Died during  
analysis time:  
N= 185
